# Supplementary material for: Electricity Consumption and Operational Carbon Emissions of European Telecom Network Operators
Source: MDPI journal article supplement (doi:10.3390/su14052637), 2022-02-24
Supplement: s1 [file s1]

Supplementary Material

# Electricity consumption and operational carbon emissions of European telecom network operators

Dag Lundén <sup>1,\*</sup>, Jens Malmodin<sup>2,\*</sup>, Pernilla Bergmark <sup>2</sup> and Nina Lövehagen <sup>2</sup>

<sup>1</sup> Telia Company AB, Stockholm, Sweden; dag.lunden@teliacompany.com

<sup>2</sup> Ericsson Research, Ericsson AB, Stockholm, Sweden

\* Correspondence: dag.lunden@teliacompany.com, jens.malmodin@ericsson.com

**Table S1.** Summarized results of aggregated collected data from ETNO Operators. For definitions, please see main article.

| Subscriptions                 |                 | ETNO Total data |            |            |            | ETNO Europe data |            |            |            |
|-------------------------------|-----------------|-----------------|------------|------------|------------|------------------|------------|------------|------------|
| (subs)                        | Unit            | 2015            | 2016       | 2017       | 2018       | 2015             | 2016       | 2017       | 2018       |
| PSTN                          | millions        | 95              | 89         | 84         | 82         | 68               | 62         | 57         | 55         |
| VoIP                          | millions        | 16              | 19         | 22         | 25         | 16               | 19         | 22         | 25         |
| Mobile                        | millions        | 694             | 707        | 663        | 664        | 265              | 270        | 256        | 255        |
| Fixed BB                      | millions        | 64              | 66         | 68         | 72         | 53               | 55         | 57         | 59         |
| <b>Total subs excl. VoIP:</b> | <b>millions</b> | <b>853</b>      | <b>862</b> | <b>815</b> | <b>818</b> | <b>386</b>       | <b>387</b> | <b>370</b> | <b>369</b> |
| Total incl. VoIP              | millions        | 869             | 881        | 837        | 843        | 402              | 406        | 392        | 394        |

  

| Total electricity consumption |            |                 |             |             |             |                  |             |             |             |
|-------------------------------|------------|-----------------|-------------|-------------|-------------|------------------|-------------|-------------|-------------|
|                               |            | ETNO Total data |             |             |             | ETNO Europe data |             |             |             |
| Network parts                 | Unit       | 2015            | 2016        | 2017        | 2018        | 2015             | 2016        | 2017        | 2018        |
| PSTN                          | TWh        | 4,3             | 4,1         | 3,9         | 3,8         | 2,9              | 2,8         | 2,7         | 2,6         |
| Mobile                        | TWh        | 8,8             | 9,0         | 9,2         | 9,5         | 4,8              | 5,0         | 5,1         | 5,3         |
| Fixed BB                      | TWh        | 3, 5            | 3,5         | 3,7         | 3,7         | 2,8              | 2,9         | 3,0         | 3,0         |
| <b>Overhead</b>               |            |                 |             |             |             |                  |             |             |             |
| Data/IP core                  | TWh        | 1,1             | 1,1         | 1,3         | 1,3         | 1,0              | 1,0         | 1,2         | 1,3         |
| Data centers                  | TWh        | 1,5             | 1,6         | 1,5         | 1,5         | 1,3              | 1,3         | 1,3         | 1,3         |
| Offices etc.                  | TWh        | 1,6             | 1,65        | 1,4         | 1,2         | 1,5              | 1,5         | 1,3         | 1,1         |
| <b>Total electricity:</b>     | <b>TWh</b> | <b>20,8</b>     | <b>20,9</b> | <b>21,0</b> | <b>21,0</b> | <b>14,3</b>      | <b>14,5</b> | <b>14,6</b> | <b>14,5</b> |

---

**Networks' electricity per subscriber – without operators' overhead**


---

| <b>Subscriber</b> |         | <b>ETNO Total data</b> |             |             |             | <b>ETNO Europe data</b> |             |             |             |
|-------------------|---------|------------------------|-------------|-------------|-------------|-------------------------|-------------|-------------|-------------|
|                   |         | <b>2015</b>            | <b>2016</b> | <b>2017</b> | <b>2018</b> | <b>2015</b>             | <b>2016</b> | <b>2017</b> | <b>2018</b> |
| PSTN average      | kWh/sub | 45                     | 46          | 46          | 46          | 43                      | 45          | 47          | 46          |
| PSTN+VoIP average | kWh/sub | 39                     | 38          | 37          | 36          | 35                      | 35          | 34          | 32          |
| Fixed BB average  | kWh/sub | 54                     | 53          | 54          | 51          | 53                      | 53          | 53          | 51          |
| Fixed average     | kWh/sub | 49                     | 49          | 50          | 49          | 47                      | 49          | 50          | 49          |
| Mobile average    | kWh/sub | 13                     | 13          | 14          | 14          | 18                      | 19          | 20          | 21          |
| Total average     | kWh/sub | 19                     | 19          | 21          | 21          | 27                      | 28          | 29          | 29          |

---

**Total electricity allocated to network parts**


---

| <b>Network parts</b> |     | <b>ETNO Total data</b> |             |             |             | <b>ETNO Europe data</b> |             |             |             |
|----------------------|-----|------------------------|-------------|-------------|-------------|-------------------------|-------------|-------------|-------------|
|                      |     | <b>2015</b>            | <b>2016</b> | <b>2017</b> | <b>2018</b> | <b>2015</b>             | <b>2016</b> | <b>2017</b> | <b>2018</b> |
| PSTN                 | TWh | 4,6                    | 4,4         | 4,2         | 4,1         | 3,2                     | 3,1         | 2,9         | 2,8         |
| Mobile               | TWh | 11                     | 11          | 11          | 12          | 6,8                     | 7,0         | 7,0         | 7,1         |
| Fixed BB             | TWh | 5,2                    | 5,3         | 5,5         | 5,5         | 4,4                     | 4,5         | 4,7         | 4,6         |

---

**Electricity/sub (all electricity incl. overhead and operators' data centers)**


---

| <b>Subscriber</b> |         | <b>ETNO Total data</b> |             |             |             | <b>ETNO Europe data</b> |             |             |             |
|-------------------|---------|------------------------|-------------|-------------|-------------|-------------------------|-------------|-------------|-------------|
|                   |         | <b>2015</b>            | <b>2016</b> | <b>2017</b> | <b>2018</b> | <b>2015</b>             | <b>2016</b> | <b>2017</b> | <b>2018</b> |
| PSTN average      | kWh/sub | 48                     | 49          | 50          | 49          | 46                      | 49          | 51          | 51          |
| PSTN+VoIP average | kWh/sub | 41                     | 40          | 39          | 38          | 38                      | 38          | 37          | 35          |
| Fixed BB average  | kWh/sub | 82                     | 80          | 81          | 76          | 83                      | 82          | 82          | 78          |
| Fixed average     | kWh/sub | 62                     | 62          | 64          | 62          | 63                      | 65          | 66          | 65          |
| Mobile average    | kWh/sub | 16                     | 16          | 17          | 17          | 26                      | 26          | 27          | 28          |
| Total average     | kWh/sub | 24                     | 24          | 26          | 26          | 37                      | 37          | 39          | 39          |

---

**Total electricity incl. overhead (data/IP core and offices), but excluding operators' datacenters**


---

| <b>Network parts</b> |     | <b>ETNO Total data</b> |             |             |             | <b>ETNO Europe data</b> |             |             |             |
|----------------------|-----|------------------------|-------------|-------------|-------------|-------------------------|-------------|-------------|-------------|
|                      |     | <b>2015</b>            | <b>2016</b> | <b>2017</b> | <b>2018</b> | <b>2015</b>             | <b>2016</b> | <b>2017</b> | <b>2018</b> |
| PSTN                 | TWh | 4,6                    | 4,4         | 4,2         | 4,1         | 3,2                     | 3,1         | 2,9         | 2,8         |
| Mobile               | TWh | 10                     | 10          | 10          | 11          | 6,1                     | 6,3         | 6,3         | 6,4         |
| Fixed BB             | TWh | 4,5                    | 4,6         | 4,8         | 4,8         | 3,8                     | 3,9         | 4,1         | 4,0         |

---

## Electricity per subscriber (electricity incl. overhead but excl. operators' datacenters)

| Subscriber    |         | ETNO Total data |      |      |      | ETNO Europe data |      |      |      |
|---------------|---------|-----------------|------|------|------|------------------|------|------|------|
|               |         | 2015            | 2016 | 2017 | 2018 | 2015             | 2016 | 2017 | 2018 |
| PSTN average  | kWh/sub | 48              | 49   | 50   | 49   | 46               | 49   | 51   | 51   |
| PSTN+VoIP     |         |                 |      |      |      |                  |      |      |      |
| average       | kWh/sub | 41              | 40   | 39   | 38   | 38               | 38   | 37   | 35   |
| Fixed BB      |         |                 |      |      |      |                  |      |      |      |
| average       | kWh/sub | 71              | 69   | 71   | 66   | 72               | 71   | 71   | 68   |
| Fixed average | kWh/sub | 57              | 58   | 59   | 57   | 58               | 59   | 61   | 60   |
| Mobile        |         |                 |      |      |      |                  |      |      |      |
| average       | kWh/sub | 15              | 15   | 16   | 16   | 23               | 23   | 25   | 25   |
| Total average | kWh/sub | 23              | 22   | 24   | 24   | 34               | 34   | 36   | 36   |

**Questionnaire (Version 2019-05-14 1.0)**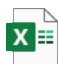

OperatorDataReport  
- 2019-05-02 1.0.xlsx

**General information****Telecom Operational data questionnaire**

*Please observe!*

*All shared information will be handled with confidentiality and will be shared only in consolidated format where no individual operator data can be identified!*

The more information you are able to provide, the better. It's better that you respond with the data that you have than not respond at all. Leave out what's appropriate for you to not to share!

Please send the filled in questionnaire to Dag Lundén.  
Remaining questions can be sent to the same address.

Deadline for response is: 2019-06-15

Lisboa the 14th of May 2019

[dag.lunden@teliacompany.com](mailto:dag.lunden@teliacompany.com)



## Explanation – Description

|                                                                                                                                                                         | Unit                 | Description                                                                                                                                                                                                                             |
|-------------------------------------------------------------------------------------------------------------------------------------------------------------------------|----------------------|-----------------------------------------------------------------------------------------------------------------------------------------------------------------------------------------------------------------------------------------|
| <b>Operator</b>                                                                                                                                                         |                      |                                                                                                                                                                                                                                         |
| <b>Country/Region (or Globally)</b>                                                                                                                                     |                      | One column per country, region or just one column for total operations                                                                                                                                                                  |
| <b>Year</b>                                                                                                                                                             |                      | One column per year, to report extra years is optional                                                                                                                                                                                  |
|                                                                                                                                                                         |                      |                                                                                                                                                                                                                                         |
| <b>Background and subscription data</b>                                                                                                                                 |                      |                                                                                                                                                                                                                                         |
| Revenue                                                                                                                                                                 | (USD)                |                                                                                                                                                                                                                                         |
| Employees                                                                                                                                                               | #                    |                                                                                                                                                                                                                                         |
| PSTN subscriptions (classic voice calls)                                                                                                                                | millions             |                                                                                                                                                                                                                                         |
| VoIP subscriptions (IP voice calls)                                                                                                                                     | millions             |                                                                                                                                                                                                                                         |
| Mobile subscriptions (Data and voice)                                                                                                                                   | millions             |                                                                                                                                                                                                                                         |
| Mobile subscriptions (Data only - No voice)                                                                                                                             | millions             |                                                                                                                                                                                                                                         |
| M2M subscriptions                                                                                                                                                       | millions             |                                                                                                                                                                                                                                         |
| Fixed broadband subscriptions                                                                                                                                           | millions             | All types incl FTTx, xDSL and CATV                                                                                                                                                                                                      |
| IPTV subscriptions                                                                                                                                                      | millions             |                                                                                                                                                                                                                                         |
| Total data traffic                                                                                                                                                      | million TB           |                                                                                                                                                                                                                                         |
| ...or Total data traffic, indexed (e.g. 2015 = 1)                                                                                                                       | Indexed              |                                                                                                                                                                                                                                         |
| When the consolidated data is published (via ETNO or by other means), do your company want to be named as a source of information or do you want to remain "anonomous"? | Named /<br>Not named | State wheter you want to be officially recognized as a source or not.                                                                                                                                                                   |
|                                                                                                                                                                         |                      |                                                                                                                                                                                                                                         |
| <b>ENERGY AND CO2 DATA</b>                                                                                                                                              |                      |                                                                                                                                                                                                                                         |
| <b>Total electricity</b>                                                                                                                                                |                      |                                                                                                                                                                                                                                         |
| Electricity consumption purchased/measured                                                                                                                              | GWh                  | As measured (including estimates) by the supplier                                                                                                                                                                                       |
| Own generation, e.g. PV or wind (included above)                                                                                                                        | GWh                  | Electricity generation and consumption on the same electricity grid. I.e. Only investments connected to the same electricity grid as the consumption is to be included.                                                                 |
| Subtracted co-locations                                                                                                                                                 | GWh                  | Other operators/customers equipment which consumption is included in the sites actual electricity purchases should be subtracted to avoid double accounting.                                                                            |
| Added external co-locations                                                                                                                                             | GWh                  | Own equipment consumption, not included in "Electricity consumption purchased/measured". I.e. electricity included in the site rent (common for mobile rooftop sites). This electricity consumption typically has to be estimated.      |
| Total electricity                                                                                                                                                       | GWh                  | Total electricity = Electricity purchased/measured + own generation - subtracted co-locations + added external co-locations                                                                                                             |
| Green electricity (certified - specified) purchased                                                                                                                     | GWh                  | Amount of green electricity purchased. The electricity needs to be certified, produced and delivered within the same electricity grid where you operate. Please note that EU carbon trading is not seen as certified green electricity. |
| Average emission factor, market based                                                                                                                                   | kton CO2/GWh         | The used average emission factor based on specific market conditions i.e. emission factors directly from the suppliers of green electricity.                                                                                            |
| Average emission factor, location based                                                                                                                                 | kton CO2/GWh         | The average emission factor for the country/region, based on IEA. The emission factor can of course also include low-carbon electricity from e.g. nuclear and hydro power.                                                              |
| Total CO2 emissions, market based                                                                                                                                       | kton CO2             | Resulting CO2 emissions.                                                                                                                                                                                                                |
| Total CO2 emissions, location based                                                                                                                                     | kton CO2             | Resulting CO2 emissions.                                                                                                                                                                                                                |
|                                                                                                                                                                         |                      |                                                                                                                                                                                                                                         |
| <b>Electricity details</b>                                                                                                                                              |                      |                                                                                                                                                                                                                                         |
| PSTN + VoIP (Fixed voice)                                                                                                                                               | GWh                  | Also including PSTN and VoIP core nodes                                                                                                                                                                                                 |
| Mobile access + Mobile core                                                                                                                                             | GWh                  | Also including the mobile core nodes                                                                                                                                                                                                    |
| Fixed broadband                                                                                                                                                         | GWh                  | All Fixed broadband access types nodes incl FTTx, xDSL and CATV                                                                                                                                                                         |
| Data transport / IP core network                                                                                                                                        | GWh                  | All data transport links and systems and all IP core nodes                                                                                                                                                                              |
| Data centers                                                                                                                                                            | GWh                  | Not including any of the core nodes above                                                                                                                                                                                               |
| Offices                                                                                                                                                                 | GWh                  |                                                                                                                                                                                                                                         |
| Stores                                                                                                                                                                  | GWh                  | Own stores!                                                                                                                                                                                                                             |
| Other                                                                                                                                                                   | GWh                  | Wearhouses, storage facilities, service locations etc                                                                                                                                                                                   |
|                                                                                                                                                                         |                      |                                                                                                                                                                                                                                         |
| <b>Diesel consumption</b>                                                                                                                                               |                      |                                                                                                                                                                                                                                         |
| Diesel @sites, off-grid/back-up                                                                                                                                         | m3                   |                                                                                                                                                                                                                                         |
| Applied Diesel emission factor                                                                                                                                          | ton CO2/m3           | Common Diesel emission factor is 2,65 ton CO2/m3                                                                                                                                                                                        |
| Total Diesel CO2 emissions                                                                                                                                              | kton CO2             |                                                                                                                                                                                                                                         |
|                                                                                                                                                                         |                      |                                                                                                                                                                                                                                         |
| <b>OPTIONAL DATA</b>                                                                                                                                                    |                      |                                                                                                                                                                                                                                         |
| Total other energy                                                                                                                                                      | GWh                  | Please specify the details below                                                                                                                                                                                                        |
| Total other energy CO2 emissions                                                                                                                                        | kton CO2             | Please specify the details below                                                                                                                                                                                                        |
|                                                                                                                                                                         |                      |                                                                                                                                                                                                                                         |
| <b>Other energy details</b>                                                                                                                                             |                      |                                                                                                                                                                                                                                         |
| Facilities (S1 + non-electricity S2)                                                                                                                                    | GWh                  |                                                                                                                                                                                                                                         |
| Vehicle fleet (S1)                                                                                                                                                      | GWh                  |                                                                                                                                                                                                                                         |
| Employee travel (S3)                                                                                                                                                    | GWh                  |                                                                                                                                                                                                                                         |
| Employee commuting (S3)                                                                                                                                                 | GWh                  |                                                                                                                                                                                                                                         |
| Transports (S3)                                                                                                                                                         | GWh                  |                                                                                                                                                                                                                                         |
| Fuel and energy supply (S3)                                                                                                                                             | GWh                  |                                                                                                                                                                                                                                         |
| Production (S3)                                                                                                                                                         | GWh                  |                                                                                                                                                                                                                                         |
| Construction (S3)                                                                                                                                                       | GWh                  |                                                                                                                                                                                                                                         |
|                                                                                                                                                                         |                      |                                                                                                                                                                                                                                         |
| <b>Other energy details CO2 emissions</b>                                                                                                                               |                      |                                                                                                                                                                                                                                         |
| Facilities (S1 + non-electricity S2)                                                                                                                                    | kton CO2             |                                                                                                                                                                                                                                         |
| Vehicle fleet (S1)                                                                                                                                                      | kton CO2             |                                                                                                                                                                                                                                         |
| Employee travel (S3)                                                                                                                                                    | kton CO2             |                                                                                                                                                                                                                                         |
| Employee commuting (S3)                                                                                                                                                 | kton CO2             |                                                                                                                                                                                                                                         |
| Transports (S3)                                                                                                                                                         | kton CO2             |                                                                                                                                                                                                                                         |
| Fuel and energy supply (S3)                                                                                                                                             | kton CO2             |                                                                                                                                                                                                                                         |
| Production (S3)                                                                                                                                                         | kton CO2             |                                                                                                                                                                                                                                         |
| Construction (S3)                                                                                                                                                       | kton CO2             |                                                                                                                                                                                                                                         |
|                                                                                                                                                                         |                      |                                                                                                                                                                                                                                         |
| <b>ADDITIONAL OPTIONAL DATA</b>                                                                                                                                         |                      |                                                                                                                                                                                                                                         |
| Data traffic, fixed subscriptions                                                                                                                                       | million TB           |                                                                                                                                                                                                                                         |
| Data traffic, mobile subscriptions                                                                                                                                      | million TB           |                                                                                                                                                                                                                                         |
| Data traffic, other                                                                                                                                                     | million TB           |                                                                                                                                                                                                                                         |
|                                                                                                                                                                         |                      |                                                                                                                                                                                                                                         |
| Mobile business share of revenue                                                                                                                                        | %                    | These figures can be used to allocate scope 1+3 emissions e.g. offices and travel                                                                                                                                                       |
| Mobile business share of employees                                                                                                                                      | %                    |                                                                                                                                                                                                                                         |
