# Supplementary material for: Electricity Consumption and Operational Carbon Emissions of European Telecom Network Operators
Source: MDPI journal article supplement (doi:10.3390/su14052637), 2022-02-24
Supplement: s1 [file s1]

Archive with 1 entries (1 files):
- sustainability-1581782-supplementary.pdf
